# Supplementary material
Source: MDPI journal article supplement (https://www.mdpi.com/2311-7524/7/5/117)
Supplement: s1 [file s1]

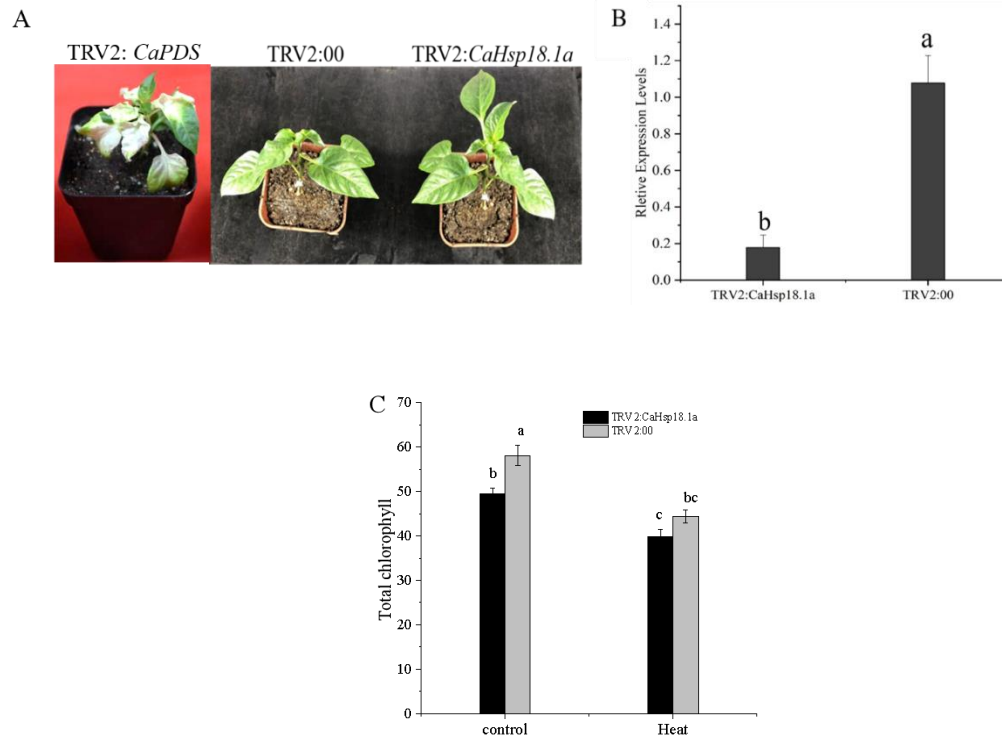

**Figure S1.** Detection of silencing efficiency of *CaHsp18.1a* gene mediated by TRV2. **(A)** Plant phenotype of pTRV2:*CaPDS*、pTRV2:00 and pTRV2:*CaHsp18.1a*;**(B)** Silencing efficiency of *CaHsp18.1a*. **(C)** Total chlorophyll content under the 42°C heat treatment for 24 h in TRV2:*CaHsp18.1a* and TRV2:00 plant phenotypes

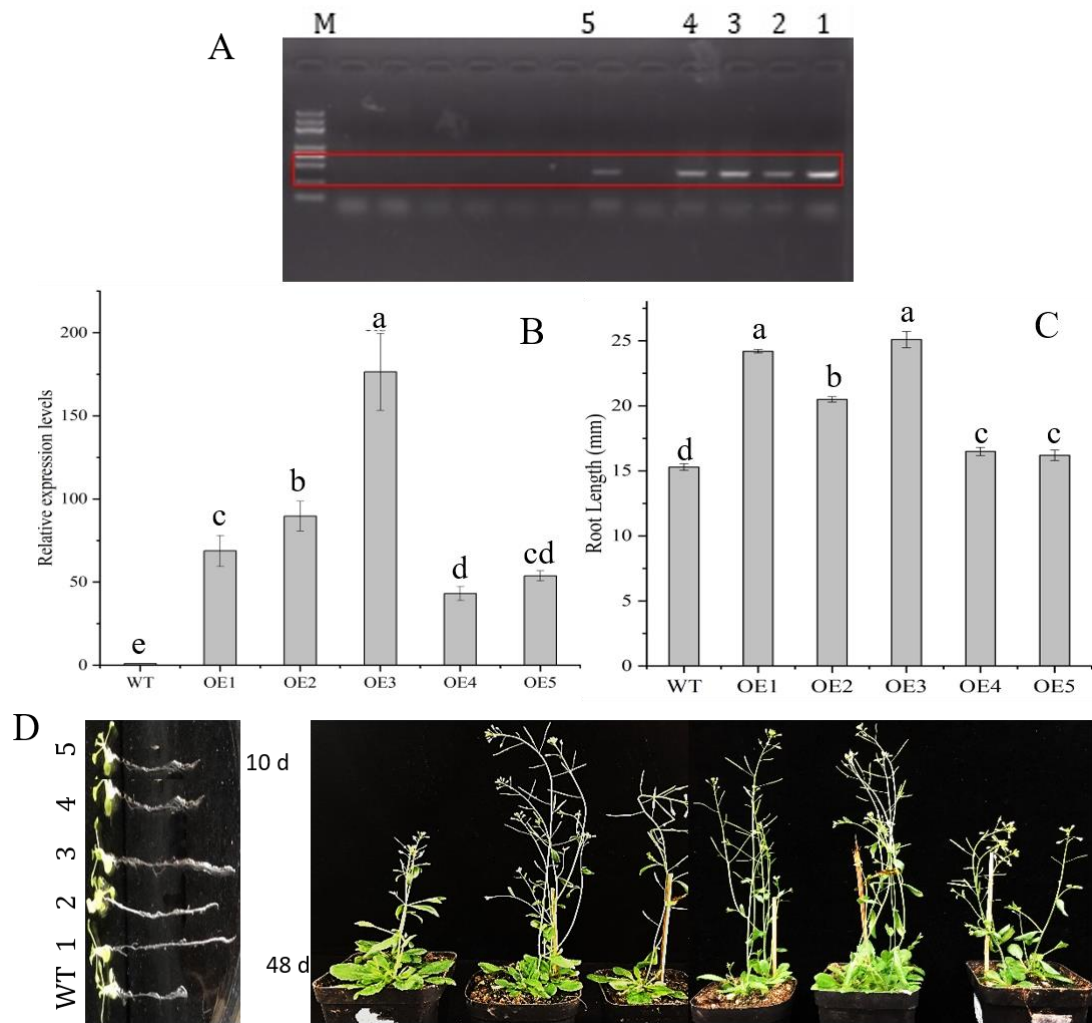

**Figure S2.** Validation and acquisition of homozygous strain of T3 generation of Arabidopsis with overexpression of *CaHsp18.1a*. **(A)** PCR analysis of the *CaHsp18.1a* gene in Arabidopsis; **(B)** Relative expression level of WT and *CaHsp18.1a*-OE Arabidopsis lines under normal conditions; **(C)** Root length of 10-days old *CaHsp18.1a*-OE Arabidopsis; **(D)** Root length and growth status of WT and *CaHsp18.1a*-OE Arabidopsis at 10 d and 48 d.

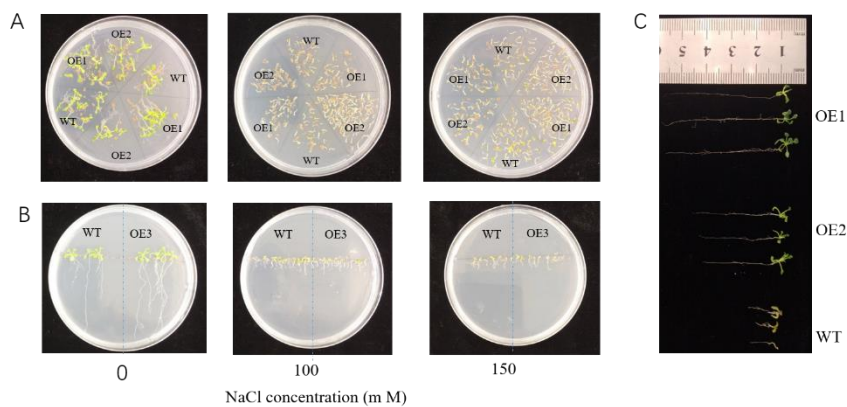

**Figure S3.** Germination of the transgenic Arabidopsis under salt stress. **(A)** Germination of WT and *CaHsp18.1a*-OE Arabidopsis seedlings grown on MS medium contain 0, 100 and 150mM NaCl for 7 days, respectively; **(B)** Root growth of WT and *CaHsp18.1a*-OE Arabidopsis lines grown on MS medium containing 0, 100 and 150mM NaCl for 10 days; **(C)** Root length of WT and *CaHsp18.1a*-OE Arabidopsis lines under salt stress

Table S1 The main primers sequence used in this research

| Primer Name               | Forward Primer                                        | Reverse Primer                                        |
|---------------------------|-------------------------------------------------------|-------------------------------------------------------|
| <i>qAtHsfB4</i>           | 5' CCGGAGTTTGCTCGTGATCT 3'                            | 5' GGTGGTGTGACATGAACGGA 3'                            |
| <i>qAtHsfA8</i>           | 5' GGCAGTATCAGGAGGTGACG 3'                            | 5' CCGATGGTGGCTGGTATGTT 3'                            |
| <i>qAtHsfA2</i>           | 5' TGGTGTGCTTGTAGCTGAGG 3'                            | 5' CTCCGTTTCCTCCCCACATC 3'                            |
| <i>qAtHsfA7A</i>          | 5' TCTTCACCAAGCCATGACGC 3'                            | 5' CGAAGGACTCTGCATTGCTC 3'                            |
| <i>qAtHsf1</i>            | 5' CGTTAAGTTACGCCAGCAGC 3'                            | 5' TCCGCTTCTTATTGGCCTCG 3'                            |
| <i>qAtHsfA3</i>           | 5' GATGACCCGACTCTTGACCC 3'                            | 5' GACCCTTGGCTTTGGCTAGT 3'                            |
| <i>qAtHsp70</i>           | 5' CAGCGTCAAGCGACTAAGGA 3'                            | 5' ACCAGCAGTTGCCTTGACTT 3'                            |
| <i>qAtHsp101</i>          | 5' ACCAGAGCTCTTGAACAGGC 3'                            | 5' TGTGAAGAGACTTACCGGGTC 3'                           |
| <i>qAtHspC300</i>         | 5' CGCTGTTCAAGCAGATTGGG 3'                            | 5' AAGGATTTGCTGTCGCGGTA 3'                            |
| <i>qAtAPX1</i>            | 5' TGCTACCAAGGGTTGTGACC 3'                            | 5' ACAGGGTCGTCCAATAGTGC 3'                            |
| <i>qAtAPX2</i>            | 5' GAGCTAGCCCATGATGCCAA 3'                            | 5' CAAGGTGTGTCCACCAGACA 3'                            |
| <i>qAtSOD1</i>            | 5' GGTCCACATTTCAACCCCGA 3'                            | 5' GGACAACAACAGCCCTACCA 3'                            |
| <i>qAtCAT</i>             | 5' CAGAGACACCGTCTTGACC 3'                             | 5' GCCTGTCTGAATCCCAGGAC 3'                            |
| <i>qAtP5CS1</i>           | 5' GCAGCTTTGCGGATCTTCAG 3'                            | 5' GATATGGGGCTCTTCGGGTG 3'                            |
| <i>qAtMYB124</i>          | 5' CGGTATCAGTACACCGCGAA 3'                            | 5' TCTGCGCCAAGGAGCTTAAA 3'                            |
| <i>qAtRD29a</i>           | 5' TATTCGCCGGAATCTGACGG 3'                            | 5' GATGCCTCACCGTATCCAGG 3'                            |
| <i>qAtNCED3</i>           | 5' CAGAGACACCGTCTTGACC 3'                             | 5' GCCTGTCTGAATCCCAGGAC 3'                            |
| <i>qAtRab18</i>           | 5' AGCTCGGAGGATGATGGACA 3'                            | 5' AGCCACCAGCATCATATCCG 3'                            |
| <i>pCaHsp18.1a-TRV2</i>   | 5'-AAGGTTACCGAATTCTCTAGA<br>ATGTCTCTGATTCCAAGC-3'     | 5'-GAGACGCGTGAGCTCGGTACC<br>ACTTTCACCTCCTCTCTC-3'     |
| <i>pCaHsp18.1a-2307</i>   | 5'-GAGAACACGGGGGACTCTAGA<br>ATGTCTCTGATTCCAAGCTTCT-3' | 5'-GGGAAATTCGAGCTCGGTACC<br>TTAACCAGATATGTCAATTGCC-3' |
| <i>pCaHsp18.1a-2307-G</i> | 5'-GAGAACACGGGGGACTCTAGA<br>ATGTCTCTGATTCCAAGCTTCT-3' | 5'-TCCCTTACCCATGGTACC<br>ACCAGATATGTCAATTGCCTTG-3'    |
